# Supplementary material for: Effect of feed impurities on catalytic performance of CuFe2O4/β-SiC for SO3 decomposition in the sulfur–iodine cycle
Source: Royal Society of Chemistry journal article supplement (doi:10.1039/d2cy00390b), 2022-01-01
Supplement: d2cy00390b1.pdf [file d2cy00390b1.pdf]

**Supplementary information**

Effect of the feed impurities on catalytic performance of  $\text{CuFe}_2\text{O}_4/\beta\text{-SiC}$  for  $\text{SO}_3$  decomposition in the sulfur–iodine cycle

Sachin Tomar, Sreedevi Upadhyayula\*

Department of Chemical Engineering, Indian Institute of Technology Delhi, Hauz Khas, New Delhi – 110016, India

\*Corresponding author

Email: [sreedevi@chemical.iitd.ac.in](mailto:sreedevi@chemical.iitd.ac.in)

**ESI1** WHSV is defined as ratio of mass flow rate of feed (g/h) to catalyst mass (g).<sup>1</sup>

$$\text{WHSV} = \frac{F_{feed}}{W_{cat}} \text{ h}^{-1}$$

ESI2 XRD of fresh  $\text{CuFe}_2\text{O}_4/\beta\text{-SiC}$

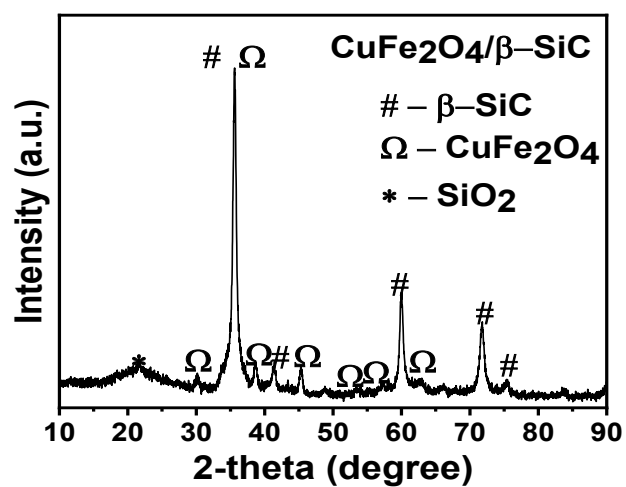

Fig. ESI2 XRD of fresh  $\text{CuFe}_2\text{O}_4/\beta\text{-SiC}$ .<sup>2</sup>

ESI3 Adsorption-desorption isotherms of fresh  $\text{CuFe}_2\text{O}_4/\beta\text{-SiC}$

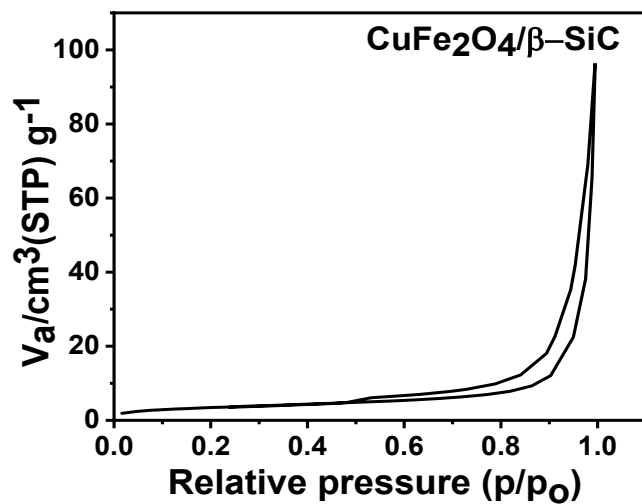

Fig. ESI3 Adsorption-desorption isotherms of fresh  $\text{CuFe}_2\text{O}_4/\beta\text{-SiC}$ .<sup>2</sup>

#### ESI4 Plausible reaction mechanism

Plausible reaction mechanism of sulfuric acid decomposition in presence of the feed impurities is discussed in this section. Potassium iodide (KI) reacts with sulfuric acid ( $\text{H}_2\text{SO}_4$ ) to form potassium bisulfate ( $\text{KHSO}_4$ ) and hydrogen iodide (HI) as shown in the equation Seq1. Hydrogen iodide, which is a strong reducing agent reacts with  $\text{H}_2\text{SO}_4$  and gets oxidised to free iodine, sulfur dioxide ( $\text{SO}_2$ ) and water ( $\text{H}_2\text{O}$ ) which is a reverse Bunsen reaction as given in the equation Seq2. The product steam containing  $\text{SO}_2$  and water vapour were trapped using concentrated sodium hydroxide, calcium oxide and silica gel. In the equation Seq3, thermal decomposition of potassium bisulfate takes place in the temperature range of 370–840 °C and it converts into potassium pyrosulfate ( $\text{K}_2\text{S}_2\text{O}_7$ ) and water.<sup>3</sup> Potassium pyrosulfate either converts into potassium metabisulfite ( $\text{K}_2\text{SO}_5$ ) and sulfur dioxide ( $\text{SO}_2$ ) as shown in the equation Seq4 or it may be converted into potassium sulfate ( $\text{K}_2\text{SO}_4$ ) and sulfur trioxide ( $\text{SO}_3$ ) between 470–700 °C as shown in the equation Seq5.<sup>3–5</sup> In the equation Seq6, potassium metabisulfite further converts into potassium sulfate and oxygen.<sup>3</sup> Potassium sulfate converts into potassium oxide and sulfur trioxide as shown in the equation Seq7. Sulfur trioxide produced in Seq5 and Seq7 converts into sulfur dioxide and oxygen over the catalytic system as shown in the equation Seq8.

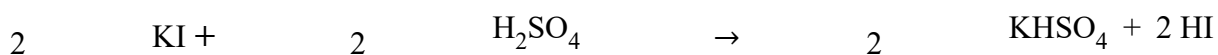

(Seq1)

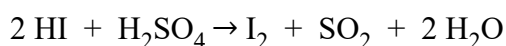

(Seq2)

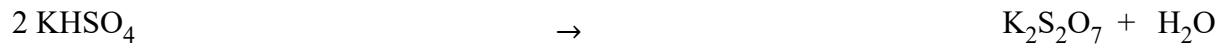

(Seq3)

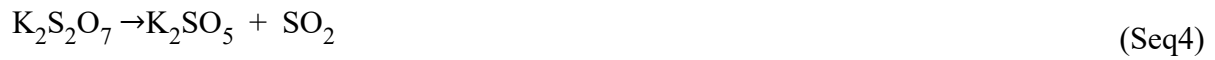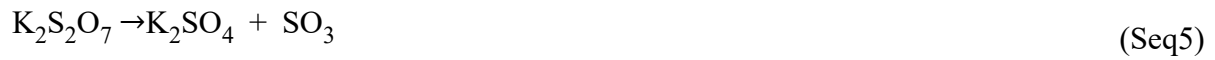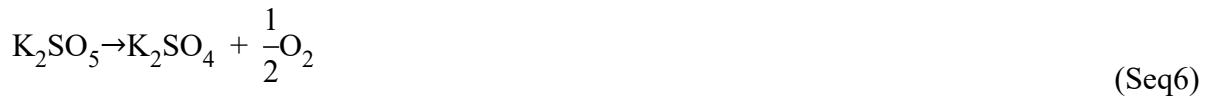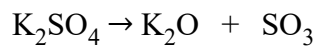

(Seq7)

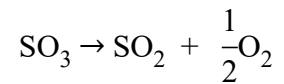

(Seq8)

### ESI5 SAED patterns of the spent catalysts

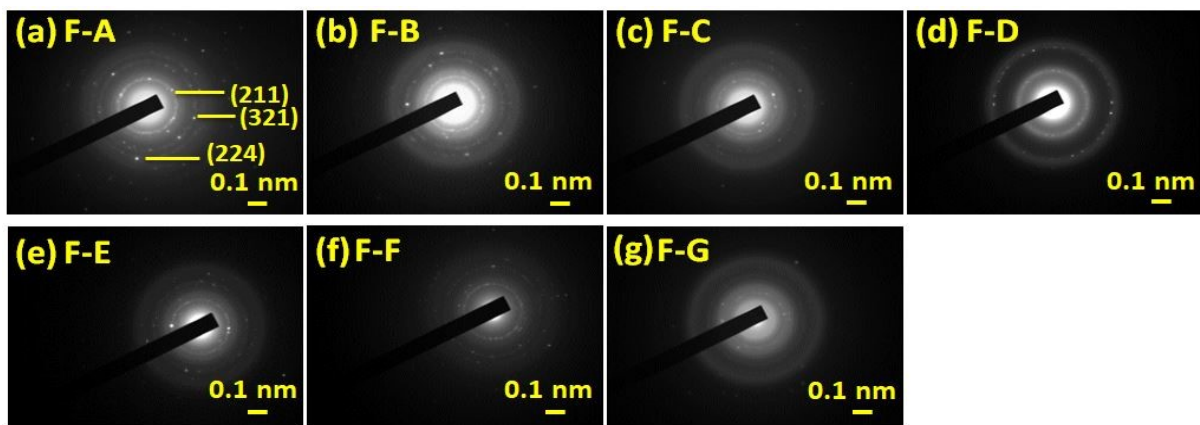

Fig. ESI5 SAED of the spent  $\text{CuFe}_2\text{O}_4/\beta\text{-SiC}$  with the different feed compositions: (a) F-A: 98 wt %  $\text{H}_2\text{SO}_4$ ; (b) F-B: 98 wt %  $\text{H}_2\text{SO}_4$  – 1 wt % HI; (c) F-C: 50 wt %  $\text{H}_2\text{SO}_4$  – 1 wt % HI –  $\text{H}_2\text{O}$  solution; (d) F-D: 50 wt %  $\text{H}_2\text{SO}_4$  – 10 wt % HI –  $\text{H}_2\text{O}$  solution; (e) F-E: 98 wt %

H<sub>2</sub>SO<sub>4</sub> – 1 wt % KI; (f) F–F: 50 wt % H<sub>2</sub>SO<sub>4</sub> – 1 wt % KI – H<sub>2</sub>O solution; (g) F–G: 50 wt % H<sub>2</sub>SO<sub>4</sub> – 10 wt % KI – H<sub>2</sub>O solution.

### ESI6 Model validation plot

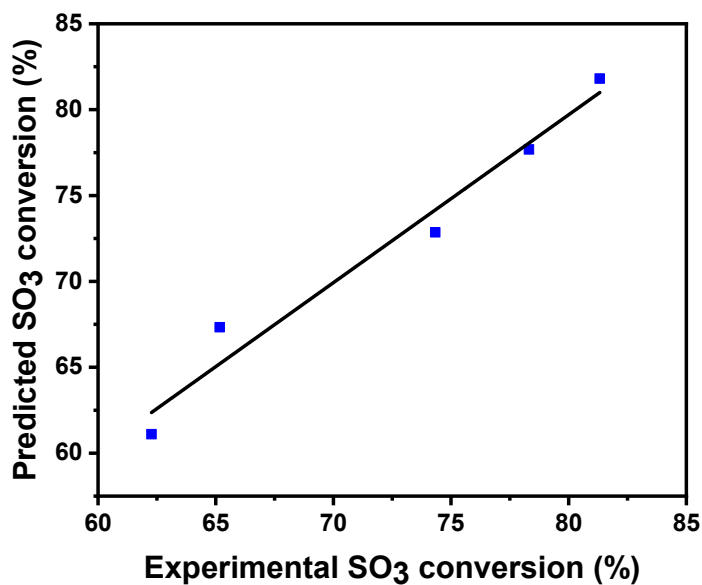

Fig. ESI6 Model validation plot of experimental and predicted SO<sub>3</sub> conversion ( $R^2 = 0.96$ ).

### References

- 1 A. Giaconia, S. Sau, C. Felici, P. Tarquini, G. Karagiannakis, C. Pagkoura, C. Agrafiotis, A. G. Konstandopoulos, D. Thomey, L. De Oliveira, M. Roeb and C. Sattler, *Int. J. Hydrogen Energy*, 2011, **36**, 6496–6509.
- 2 S. Tomar, S. Gangwar, K. Kondamudi and S. Upadhyayula, *Int. J. Hydrogen Energy*, 2020, **45**, 21287–21296.
- 3 K. J. De Vries and P. J. Gellings, *J. Inorg. Nucl. Chem.*, 1969, **31**, 1307–1313.
- 4 W. W. Wendlandt and E. Sturm, *J. Inorg. Nucl. Chem.*, 1963, **25**, 535–544.
